# Supplementary material
Source: publisher site journal article supplement (https://www.dovepress.com/article/501614)
Supplement: Supplementary file 1 [file get_supplementary_file.php]

**妊娠期糖尿病孕妇血糖管理保护动机问卷**

**The Blood Glucose Management Protection Motivation Questionnaire for Patients with Gestational Diabetes Mellitus**

| 维度  (Dimensions) | 条目  (Items) | 英文条目  (English items) |
| --- | --- | --- |
| 易感性  (Susceptibility) | 1.若不进行规范的门诊随访，血糖会控制不好 | 1. If regular outpatient follow-up is not conducted, blood sugar will be poorly controlled. |
|  | 2.若不规律监测血糖，血糖会控制不好 | 2. If blood sugar is not monitored regularly, it will be difficult to control blood sugar levels. |
|  | 3.若不合理控制饮食，血糖会控制不好 | 3. If the diet is not managed properly, blood sugar will not be well controlled. |
|  | 4.若不保持适宜的运动，血糖会控制不好 | 4. If adequate physical activity is not maintained, blood sugar will be difficult to control. |
| 严重性  (Severity) | 5.血糖控制不佳会增加我和孩子不良妊娠结局的风险 | 5. Poor blood sugar control will increase the risk of adverse pregnancy outcomes for both me and my baby. |
|  | 6.血糖控制不佳会增加我和孩子远期患糖尿病的风险 | 6. Poor blood sugar control will increase the long-term risk of diabetes for both me and my child. |
|  | 7.血糖控制不佳会增加我频繁就诊及住院的可能 | 7. Poor blood sugar control will increase the likelihood of frequent doctor visits and hospitalizations for me. |
|  | 8.血糖控制不佳会增加我家庭的经济负担 | 8. Poor blood sugar control will increase the financial burden on my family. |
|  | 9.血糖控制不佳会增加我家人的照护负担 | 9. Poor blood sugar control will increase the caregiving burden on my family members. |
| 内部奖励  (Internal Rewards) | 10.孕期吃我喜欢的食物会让我感到很愉快 | 10. Eating the foods I enjoy during pregnancy makes me feel happy. |
|  | 11.我觉得孕期应该多吃些，这样有利于宝宝的健康 | 11. I believe that eating more during pregnancy is beneficial for the health of my baby. |
|  | 12.孕期减少运动、多休息，能让我感到更轻松 | 12. Reducing physical activity and resting more during pregnancy makes me feel more relaxed. |
|  | 13.孕期减少血糖测量次数，会让我感到更轻松 | 13. Reducing the frequency of blood sugar measurements during pregnancy makes me feel more at ease. |
| 外部奖励  (External Rewards) | 14.我家人希望我孕期尽可能多摄入营养丰富的食物 | 14. My family hopes that I consume as many nutritious foods as possible during pregnancy. |
|  | 15.我家人希望我孕期多增加休息、少运动 | 15. My family hopes that I get more rest and reduce physical activity during pregnancy. |
|  | 16.我家人希望我不要频繁测量血糖 | 16. My family hopes that I do not measure my blood sugar too frequently. |
|  | 17.我家人不希望我频繁去产科门诊随访 | 17. My family does not want me to have frequent visits to the obstetrics clinic for follow-up. |
| 反应效能  (Response Efficacy) | 18.规范的门诊随访有利于孕期血糖管理 | 18. Regular outpatient follow-up is beneficial for managing blood sugar during pregnancy. |
|  | 19.合理的饮食管理有利于控制血糖 | 19. Proper dietary management is essential for controlling blood sugar levels. |
|  | 20.保持规律的运动锻炼有利于控制血糖 | 20. Maintaining a regular exercise routine is beneficial for controlling blood sugar. |
|  | 21.规律的血糖监测有利于了解孕期血糖变化情况 | 21. Regular blood sugar monitoring is helpful for tracking changes in blood sugar during pregnancy. |
| 自我效能  (Self-Efficacy) | 22.我有信心在孕期控制好血糖水平 | 22. I am confident that I can control my blood sugar levels during pregnancy. |
|  | 23.我有信心在孕期按照医生建议调整饮食 | 23. I am confident that I can adjust my diet according to the doctor’s recommendations during pregnancy. |
|  | 24.我有信心在孕期保持规律的运动锻炼 | 24. I am confident that I can maintain a regular exercise routine during pregnancy. |
|  | 25.我有信心在孕期按照医生建议定时测量血糖 | 25. I am confident that I can measure my blood sugar at the recommended times during pregnancy, as advised by my doctor. |
| 反应代价  (Response Costs) | 26.频繁去产科门诊复查给我带来很大负担 | 26. Frequent visits to the obstetrics clinic for follow-up place a significant burden on me. |
|  | 27.孕期按照医生建议调整我的饮食，对我来说很困难 | 27. Adjusting my diet according to the doctor's recommendations during pregnancy is very difficult for me. |
|  | 28.孕期每天进行规律的运动锻炼，对我来说很困难 | 28. Engaging in regular exercise every day during pregnancy is very challenging for me. |
|  | 29.孕期频繁测量血糖，对我造成很大压力 | 29. Frequently measuring my blood sugar during pregnancy causes me a great deal of stress. |

Notes: The English items were translated by two bilingual master’s students and have not undergone cultural adaptation. They are provided solely for readers’ understanding of the content of the questionnaire.
